# Supplementary material for: Dual role of transcription and transcript stability in the regulation of gene expression in Escherichia coli cells cultured on glucose at different growth rates
Source: PubMed Central journal article supplement (PMC3936743; doi:10.1093/nar/gkt1150), 2013-11-15
Supplement: supp_gkt1150_nar-01935-a-2013-File010.pdf [file supp_gkt1150_nar-01935-a-2013-File010.pdf]

FigS1

| Genes       | Microarray<br>half-life | qPCR<br>half-life |
|-------------|-------------------------|-------------------|
| <i>lpp</i>  | 43.4                    | 30.5              |
| <i>ompC</i> | 20.2                    | 11.5              |
| <i>ompA</i> | 9.1                     | 4.6               |
| <i>acs</i>  | 8.0                     | 3.7               |
| <i>glgS</i> | 7.9                     | 8.7               |
| <i>infA</i> | 4.4                     | 2.5               |
| <i>ihfB</i> | 4.4                     | 4.8               |
| <i>edd</i>  | 4.3                     | 2.0               |
| <i>maeA</i> | 2.1                     | 2.9               |
| <i>ppsA</i> | 1.9                     | 1.6               |
| <i>sdhD</i> | 1.6                     | 1.3               |

**Figure S1.** Comparison of mRNA half-lives measured by the microarray-based technique and by qPCR. mRNA half-lives are expressed in minutes.

## FigS2

| Gene class                      | This study                                   |                     | Bernstein et al. 2002                        |                   |
|---------------------------------|----------------------------------------------|---------------------|----------------------------------------------|-------------------|
|                                 | M9 medium 37°C / $\mu = 0.63 \text{ h}^{-1}$ |                     | M9 medium 30°C / $\mu = 0.47 \text{ h}^{-1}$ |                   |
|                                 | Number of genes<br>in category               | Median<br>half-life | Number of genes<br>in category               | Mean<br>half-life |
| Amino acid synthesis            | 155                                          | 2.0                 | 96                                           | 3.8               |
| Macromolecule synthesis         | 180                                          | 2.1                 | 206                                          | 4.4               |
| Nucleotide synthesis            | 33                                           | 2.2                 | 30                                           | 4.6               |
| Synthesis of cofactors/carriers | 148                                          | 2.1                 | 106                                          | 4.8               |
| Cell division                   | 53                                           | 2.1                 | 37                                           | 5.0               |
| Macromolecule degradation       | 74                                           | 2.3                 | 60                                           | 5.0               |
| Fatty acid synthesis            | 16                                           | 2.4                 | 20                                           | 5.1               |
| Regulation                      | 334                                          | 2.8                 | 49                                           | 5.1               |
| Adaptation to stress            | 94                                           | 3.1                 | 25                                           | 5.1               |
| Ribosome constituents           | 53                                           | 2.4                 | 50                                           | 5.4               |
| Central intermediary metabolism | 273                                          | 3.2                 | 170                                          | 5.6               |
| Protection responses            | 104                                          | 3.0                 | 44                                           | 6.0               |
| Transport/Binding proteins      | 429                                          | 3.0                 | 393                                          | 6.2               |
| Energy metabolism, carbon       | 165                                          | 3.7                 | 173                                          | 6.3               |

**Figure S2.** Gene function and mRNA stability. This table compares the median half-lives of gene-family memberships that we measured with the results published by Bernstein et al, (Bernstein et al, 2002, Proc. Natl. Acad. Sci. 99: 9697–9702) (21). In both studies half-lives were measured in *E. coli* cells in the exponential phase of growth on minimal medium (but at different temperatures in the two studies). The functional classification is based on Riley GenProtEC annotation (Serres et al, 2004, Nucleic Acids Res. 32: D300-D302) (47).
