# Supplementary material for: Dual role of transcription and transcript stability in the regulation of gene expression in Escherichia coli cells cultured on glucose at different growth rates
Source: PubMed Central journal article supplement (PMC3936743; doi:10.1093/nar/gkt1150), 2013-11-15
Supplement: supp_gkt1150_nar-01935-a-2013-File012.pdf [file supp_gkt1150_nar-01935-a-2013-File012.pdf]

**Table S3.** Functional categories enriched in the group of mRNAs with concentration under mainly degradational control (p-value < 0.07). For each category, the associated genes are listed according to the number of comparisons (one or two) in which the degradational control is present.

| Functional category                   | Two comparisons         | One comparison                                                                                       |
|---------------------------------------|-------------------------|------------------------------------------------------------------------------------------------------|
| <b>Fatty acid biosynthesis</b>        | -                       | <i>accA, acpP, fabF, fabG, fabI, fabR, fabZ, lipA</i>                                                |
| <b>Purine nucleotide biosynthesis</b> | -                       | <i>adk, atpE, atpF, atpH, flil, guaA, guaB, kdpB, purA, purB, purC, purD, purF, purM, purN, purT</i> |
| <b>Amino acid biosynthesis</b>        |                         |                                                                                                      |
| - Val/Leu/Ile                         | <i>leuB, leuC</i>       | <i>asd, ilvB, ilvC, ilvD, ilvE, ilvN</i>                                                             |
| - His                                 | <i>hisB, hisH, hisJ</i> | <i>hisD, hisI</i>                                                                                    |
| - Arg                                 | -                       | <i>argA, argC, argE, argF, argG, carB</i>                                                            |
| - Cys/Met                             | -                       | <i>cysH, cysI, cysJ, cysK, iscS, metB, metC, metE, metJ, mmuM, mtn</i>                               |
| - Ser/Gly                             | -                       | <i>serA, serC, glyA, sdaA</i>                                                                        |
| - Asp/Asn/Thr/Lys                     | <i>aspC</i>             | <i>asd, asnA, asnB, dapA, dapD, thrA, thrB</i>                                                       |
